# Supplementary material for: Study on the photocatalytic properties differences between the 1-D and 3-D W18O49 particles
Source: Royal Society of Chemistry journal article supplement (doi:10.1039/d3ra01031g), 2023-01-01
Supplement: d3ra01031g1.pdf [file d3ra01031g1.pdf]

## Study on the photocatalytic properties differences between the 1-D and 3-D $W_{18}O_{49}$ particles

Juan Wang,<sup>a,\*</sup> Zhaoxiang Wang,<sup>a</sup> Jichao Gao,<sup>a</sup> Jin Ye,<sup>b,\*</sup>

<sup>a</sup> School of Chemistry & Chemical Engineering, Linyi University, Linyi 276000, P. R. China

<sup>b</sup> Key Laboratory of Forest Plant Ecology, Ministry of Education, College of Chemistry, Chemical Engineering and Resource Utilization, Northeast Forestry University, Harbin 150040, P. R. China

---

\*Corresponding author:

*E-mail addresses:* *E-mail addresses:* [juanwang117@163.com](mailto:juanwang117@163.com) (J. Wang);

[wzx13864176731@163.com](mailto:wzx13864176731@163.com) (Z. Wang); [lyly1901@126.com](mailto:lyly1901@126.com) (J. Gao); [yejin@nefu.edu.cn](mailto:yejin@nefu.edu.cn) (J. Ye)

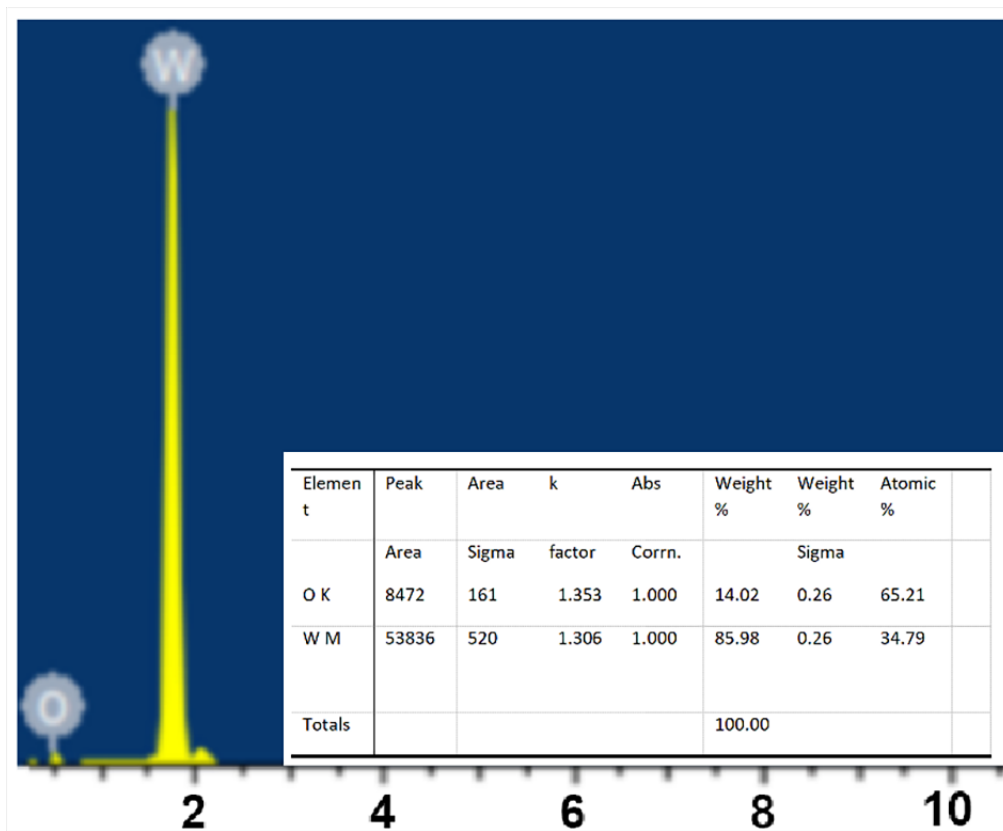

Fig. S1. the content of the elements O, W in 3-D urchin-like  $W_{18}O_{49}$

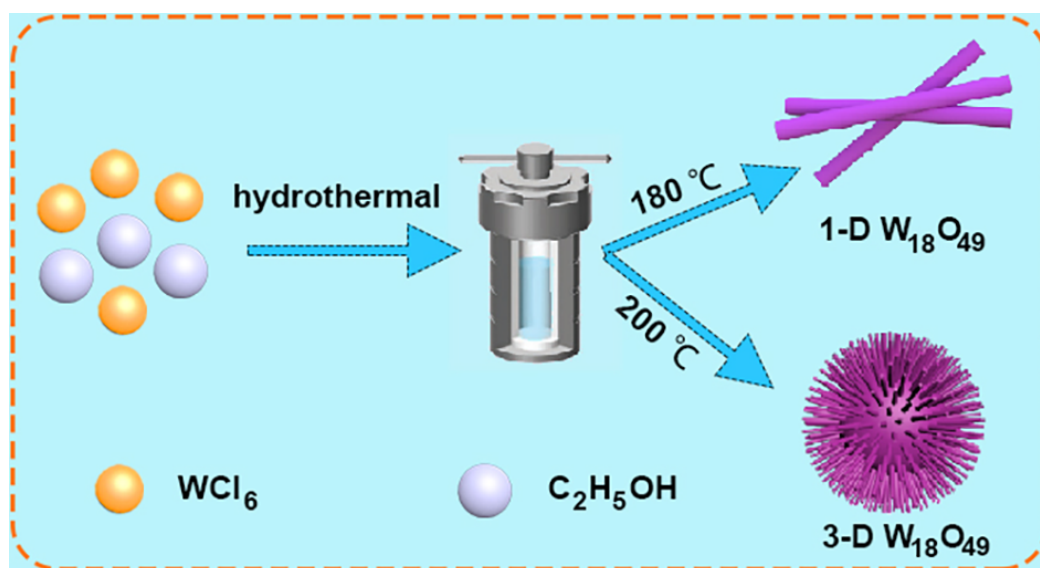

**Fig. S2.** The schematic diagram for the preparation process of  $W_{18}O_{49}$ .

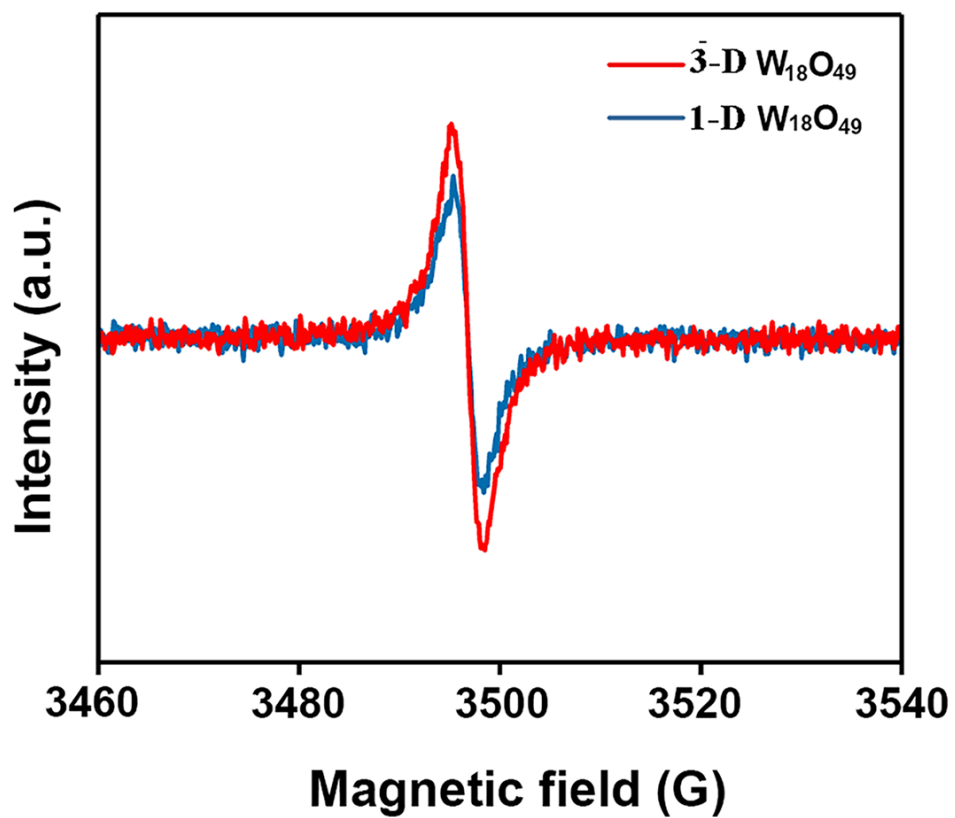

Fig. S3. EPR spectra of 1-D  $W_{18}O_{49}$  nanowires and 3-D urchin-like  $W_{18}O_{49}$ .

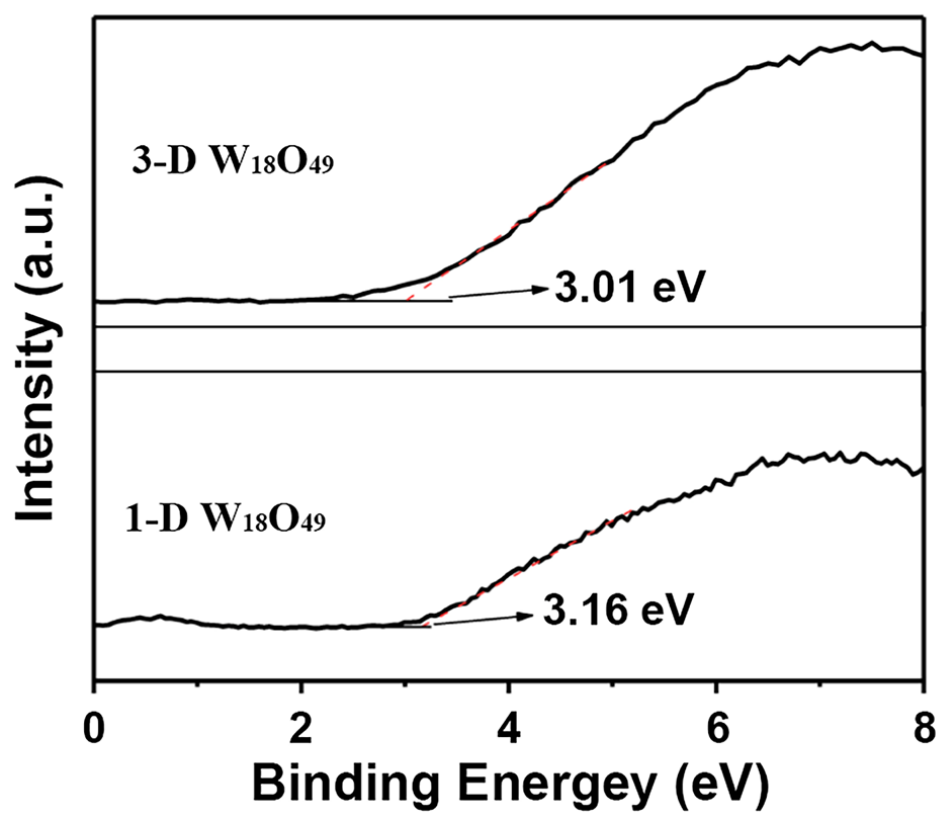

**Fig. S4.** XPS valence band spectra of 1-D W<sub>18</sub>O<sub>49</sub> nanowires and 3-D urchin-like W<sub>18</sub>O<sub>49</sub>.

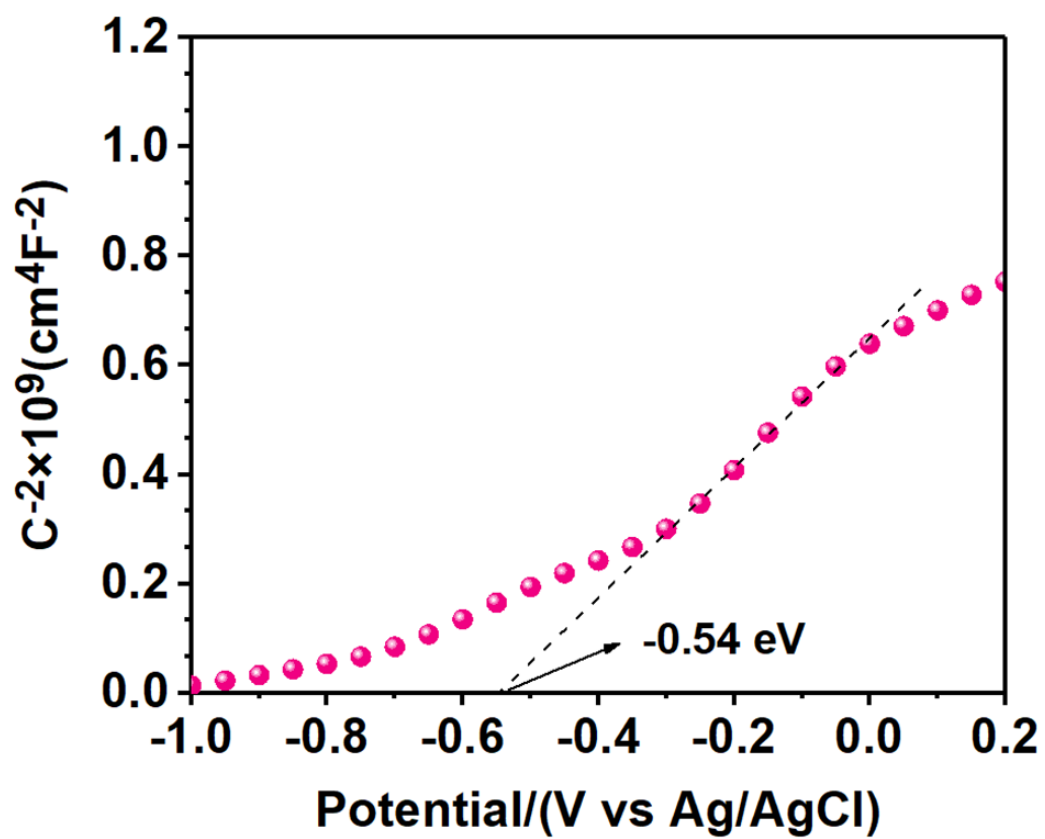

Fig. S5. Mott-Schottky plots of 3-D  $W_{18}O_{49}$ .

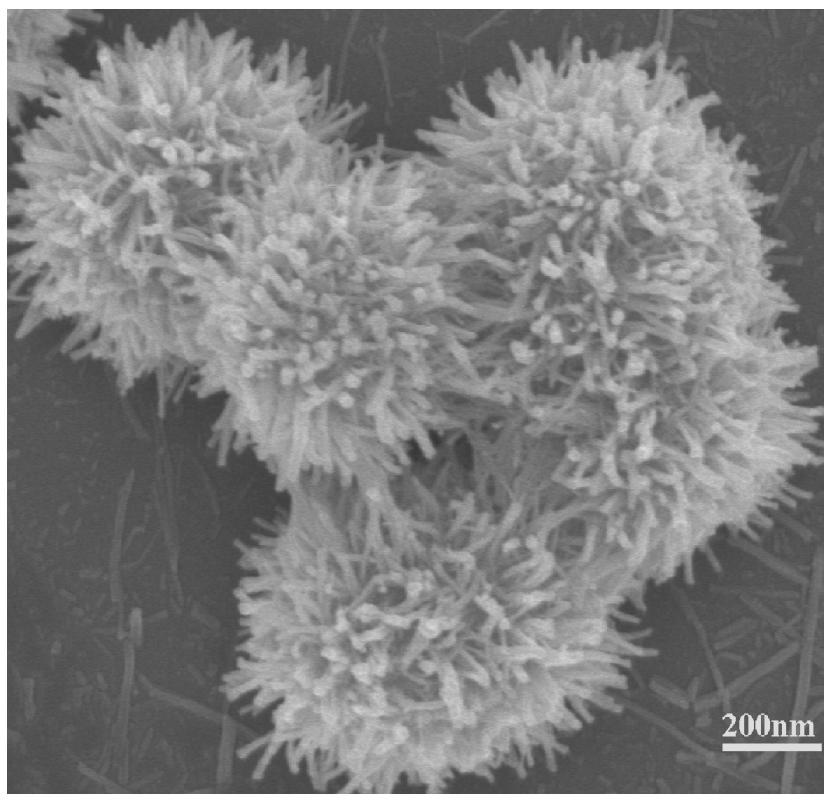

**Fig. S6.** SEM image of 3-D  $W_{18}O_{49}$  particle obtained after the photocatalytic degradation of MB
